## RESEARCH ARTICLE

# The Exponentiated Exponential Burr XII distribution: Theory and application to lifetime and simulated data

Majdah Badr<sup>1</sup>, Muhammad Ijaz<sup>2\*</sup>

**1** Faculty of Science for Girls, Statistics Department, University of Jeddah, Jeddah, Saudi Arabia,  
**2** Department of Statistics, University of Peshawar, Peshawar, KPK, Pakistan

\* [ijaz.statistics@gmail.com](mailto:ijaz.statistics@gmail.com)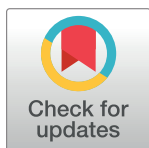**OPEN ACCESS**

**Citation:** Badr M, Ijaz M (2021) The Exponentiated Exponential Burr XII distribution: Theory and application to lifetime and simulated data. PLoS ONE 16(3): e0248873. <https://doi.org/10.1371/journal.pone.0248873>

**Editor:** Alessandro Barbiero, Universita degli Studi di Milano, ITALY

**Received:** July 22, 2020

**Accepted:** March 7, 2021

**Published:** March 26, 2021

**Copyright:** © 2021 Badr, Ijaz. Due to the similarity of this article with a previously published work, the article contents were removed from *PLOS ONE* after retraction. Readers are hereby on notice that the removed contents are not offered under the [Creative Commons Attribution License](https://creativecommons.org/licenses/by/4.0/); see the accompanying retraction notice for details.

**Data Availability Statement:** The Data Availability statement was deleted at the time of the article's removal. See the accompanying retraction notice for more information.

**Funding:** The author(s) received no specific funding for this work.

**Competing interests:** The authors have declared that no competing interests exist.
